# Supplementary material for: Sphingosine 1-Phosphate Receptor 5 (S1P5) Deficiency Promotes Proliferation and Immortalization of Mouse Embryonic Fibroblasts
Source: MDPI journal article supplement (doi:10.3390/cancers14071661), 2022-03-25
Supplement: s1 [file s1]

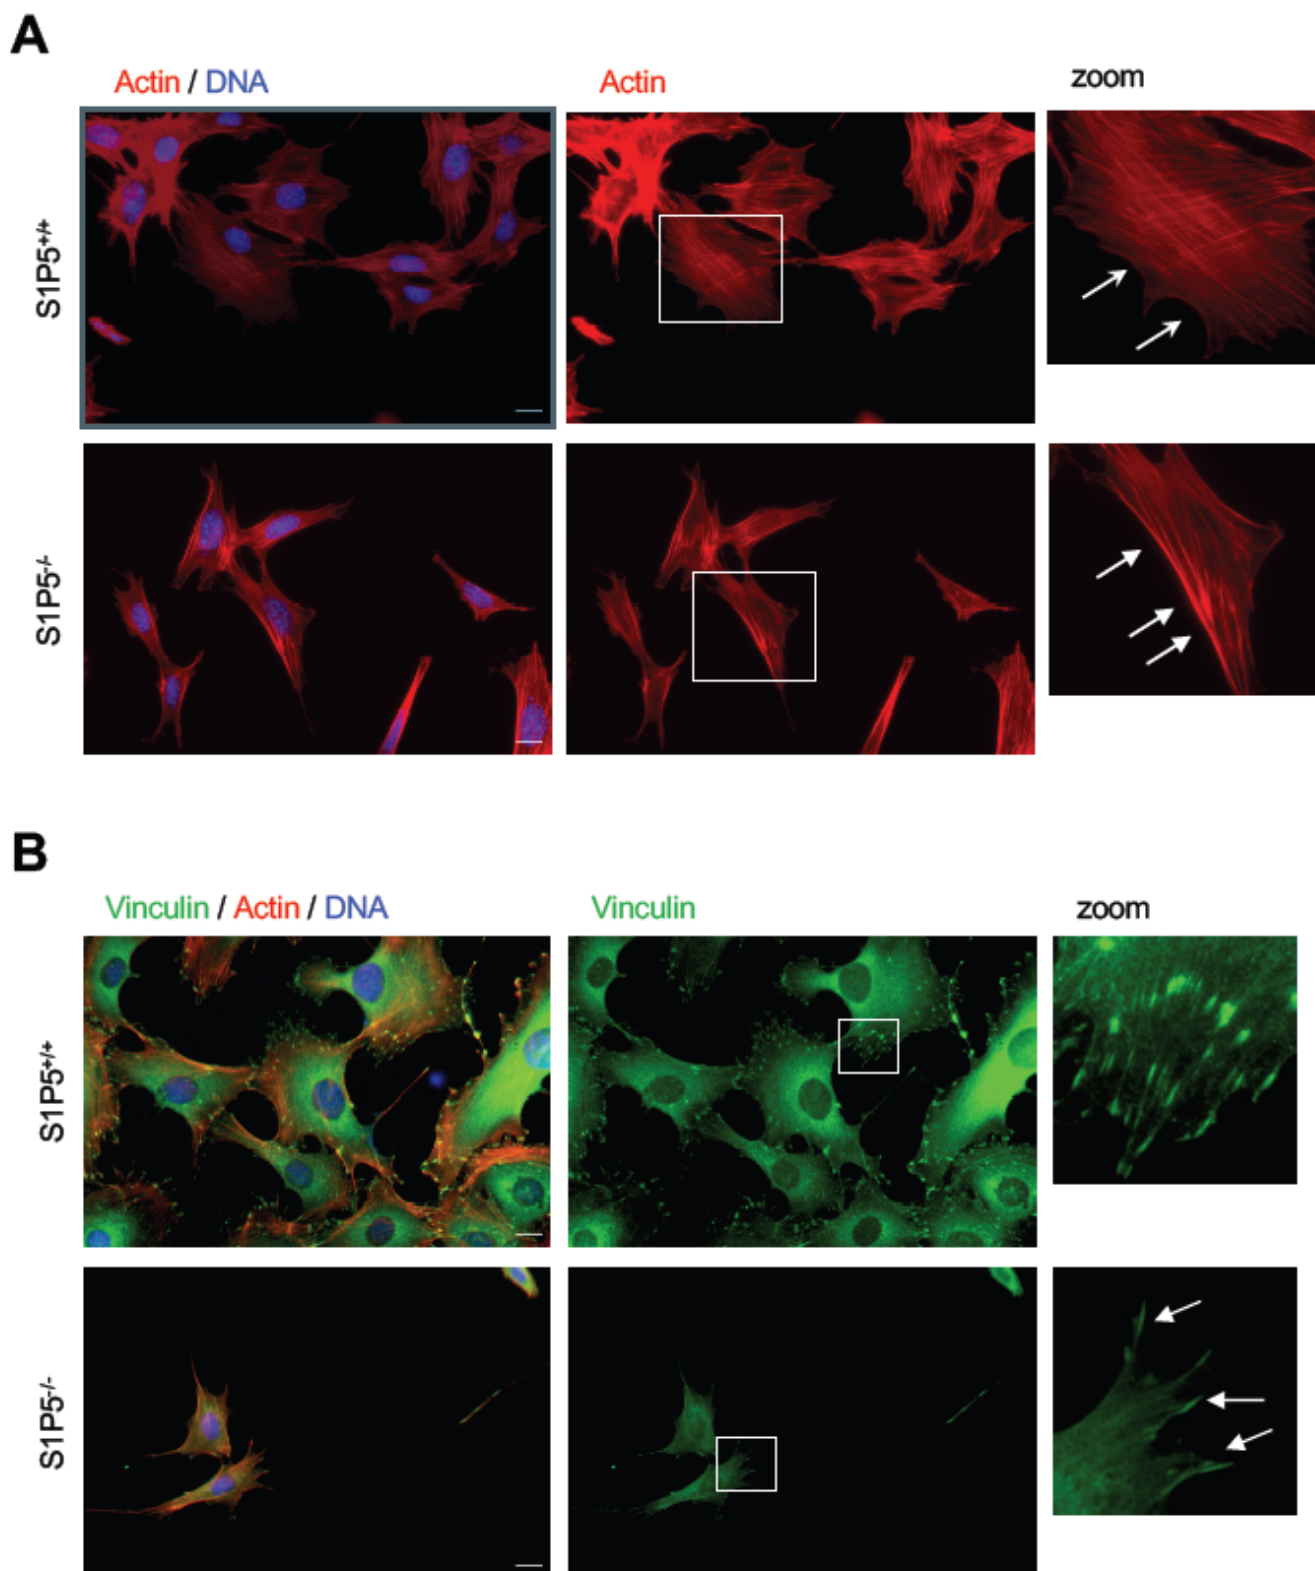

**Figure S1.** Actin organization and FA in S1P5<sup>-/-</sup> MEFs. (A), Representative images of S1P5<sup>+/+</sup> and S1P5<sup>-/-</sup> MEFs cultured in medium containing 10% FCS. Cells were fixed 24 h post plating and stained for F-Actin (Phalloidin-red) and DNA (Hoechst 33342-blue). Scale bar, 10  $\mu$ m. (B), Representative images of S1P5<sup>+/+</sup> and S1P5<sup>-/-</sup> MEFs cultured as in A and stained for F-Actin (Phalloidin-red), vinculin (a-vin-green) and DNA (Hoechst 33342-blue). Scale bar, 10  $\mu$ m.

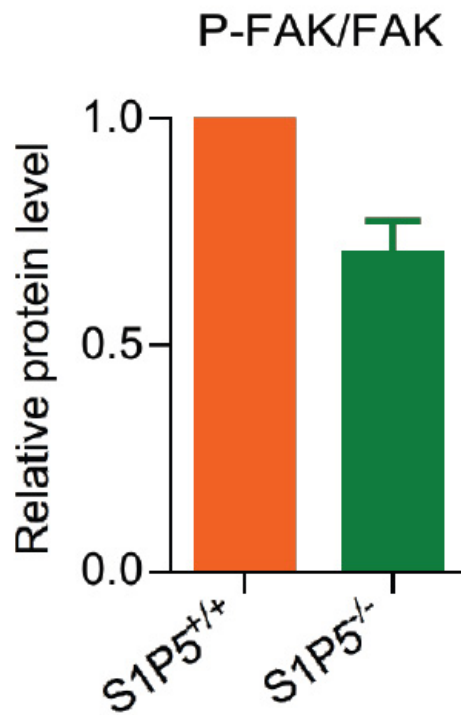

**Figure S2.** FAK phosphorylation is decreased in S1P5<sup>-/-</sup> MEFs. S1P5<sup>+/+</sup> and S1P5<sup>-/-</sup> MEFs were cultured in medium containing 10% FCS during 24 h, and the total cell extracts were analyzed by SDS/PAGE with antibodies against phosphorylated FAK, FAK and tubulin. Data represent the quantification of relative P-FAK/FAK levels of 3 independent experiments (means  $\pm$  SEM).
