# Supplementary figures and images for: Sphingosine 1-Phosphate Receptor 5 (S1P5) Deficiency Promotes Proliferation and Immortalization of Mouse Embryonic Fibroblasts
Source: MDPI journal article supplement (doi:10.3390/cancers14071661), 2022-03-25

# Original images for Western blots

Figure 3E

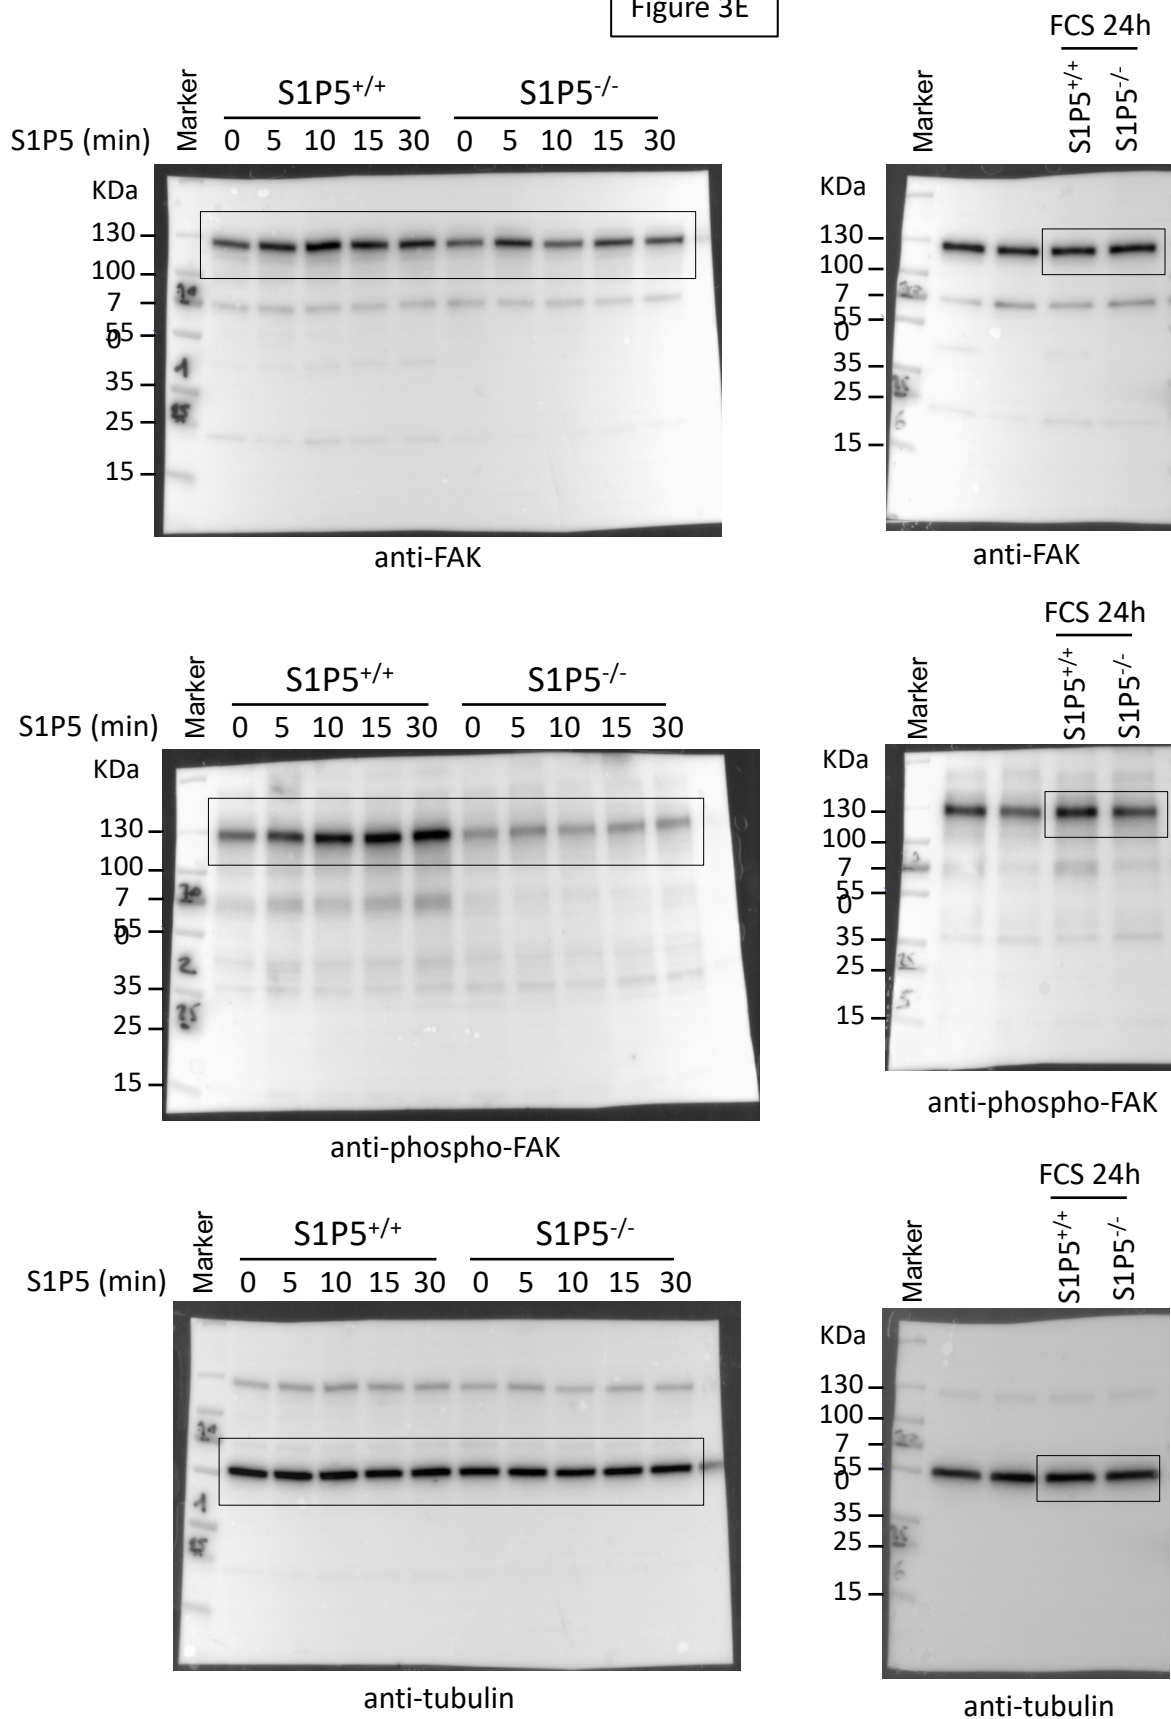

Figure 8A

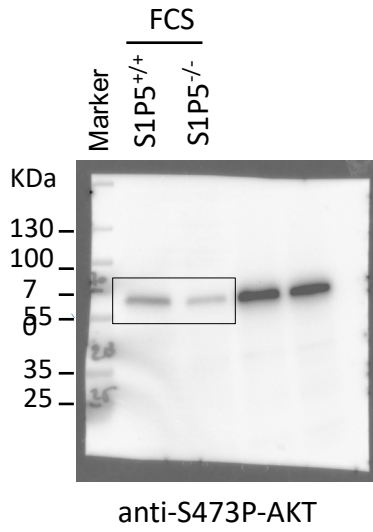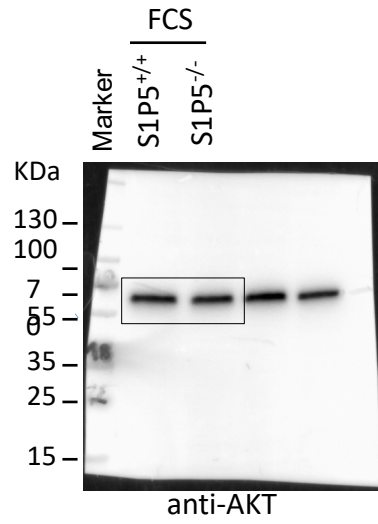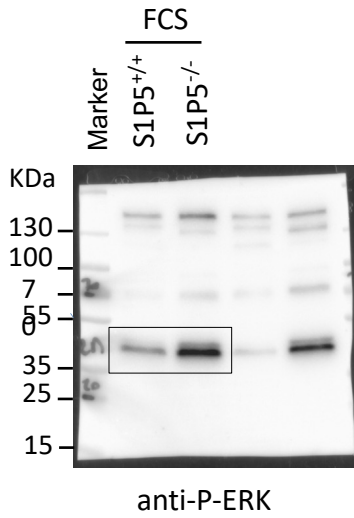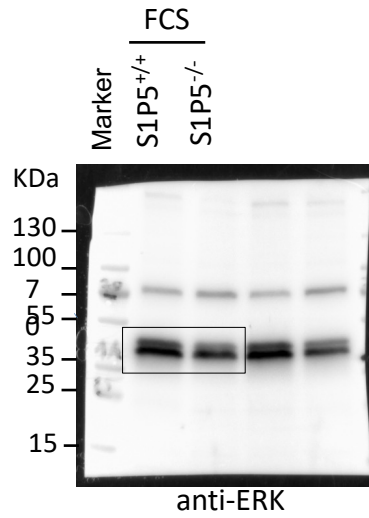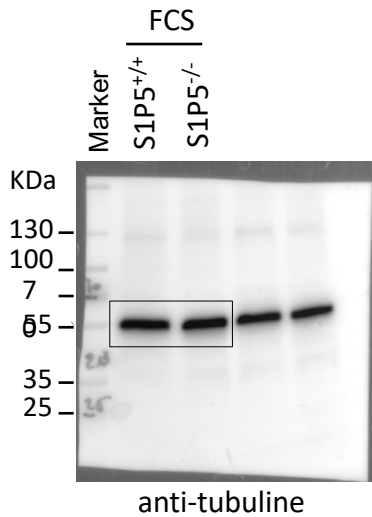

Supplement: s1 [file s1]
